# Supplementary material for: Spintronic hydrogen evolution induced by surface plasmon of silver nanoparticles loaded on Fe- and Co-doped ZnO nanorods
Source: Royal Society of Chemistry journal article supplement (doi:10.1039/d1ta04949f), 2021-01-01
Supplement: d1ta04949f1.pdf [file d1ta04949f1.pdf]

# Supporting Information

## **Spintronic Hydrogen Evolution Induced by Surface Plasmon of Silver Nanoparticles Loaded on Fe and Co doping ZnO Nanorods**

Po-Yen Kung<sup>a,#</sup>, Fei Pan<sup>b,#,+</sup>, Yen-Hsun Su<sup>a,\*</sup>

<sup>a</sup>Department of Materials Science and Engineering, National Cheng Kung University, Tainan, Taiwan.

<sup>b</sup>Physics Department, Technische Universität München, James-Franck-Straße 1, Garching 85748, Germany

\*Correspondence: yhsu@mail.ncku.edu.tw

#Contributed equally

<sup>+</sup>Present address: Empa, Swiss Federal Laboratories for Materials Science and Technology, Laboratory for Biointerfaces, Lerchenfeldstrasse 5, 9014 St. Gallen, Switzerland

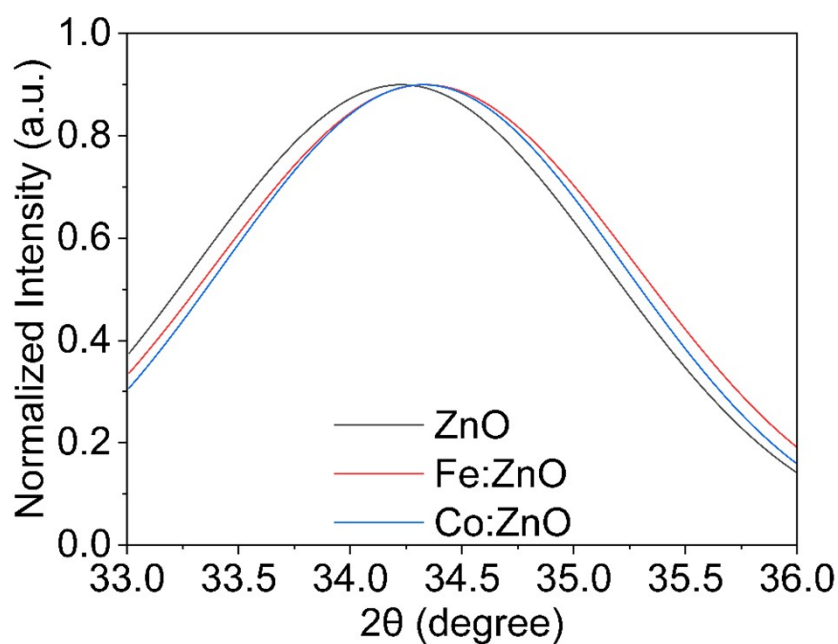

Figure S1. X-ray diffraction of TM:ZnO (TM: Fe, Co) NRs coated by silver NPs in the (002)-indexed plane (corresponding to JCPDS No.36-1451).

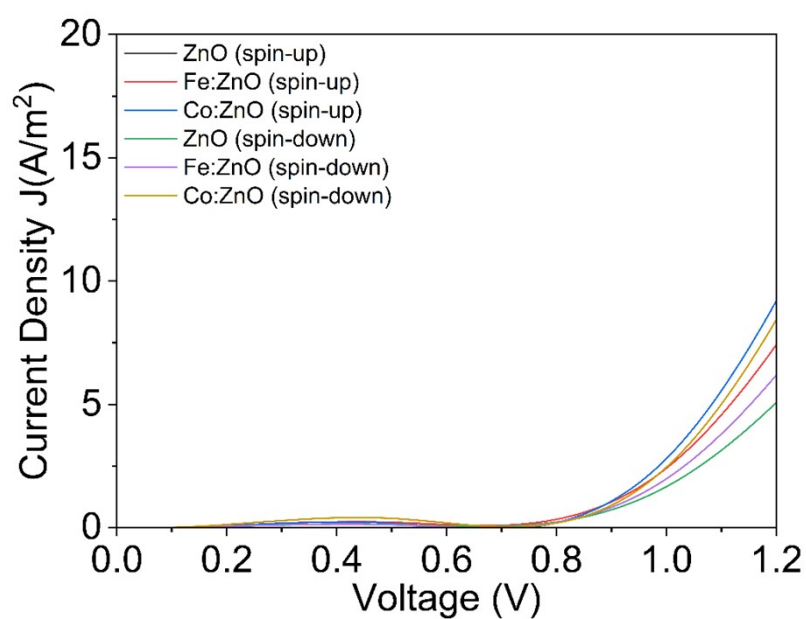

Figure S2. LSV-curve of ZnO, Fe:ZnO and Co:ZnO NRs layer on the ITO glass substrate with 0.2 M  $\text{KHCO}_3$  as the electrolyte under 405-nm circular polarized light of coherent  $\hbar$  /  $-\hbar$  radiation. The voltage is referred to reversible hydrogen electrode (RHE).

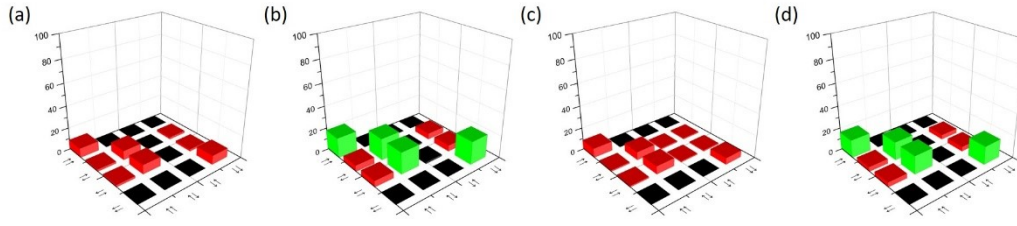

Figure S3. Quantum state tomography of the Bell states under applied voltage of 0.5 V to a coating of silver NPs on (a) Fe:ZnO NRs with 405 nm, (b) Co:ZnO NRs with 405 nm, (c) Fe:ZnO NRs with 532 nm, (d) Co:ZnO NRs with 532 nm, respectively.

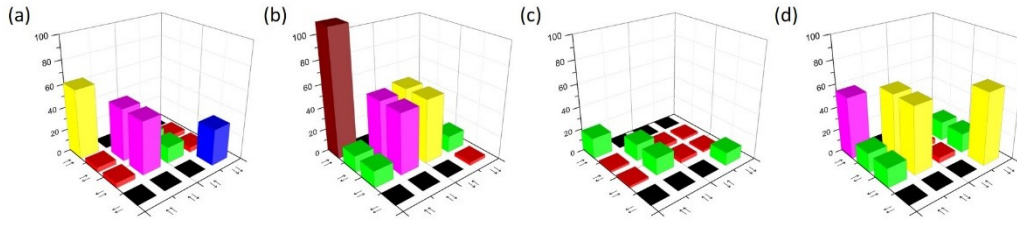

Figure S4. Quantum state tomography of the Bell states under applied voltage of 1.5 V to a coating of silver NPs on (a) Fe:ZnO NRs with 405 nm, (b) Co:ZnO NRs with 405 nm, (c) Fe:ZnO NRs with 532 nm, (d) Co:ZnO NRs with 532 nm, respectively.
